# Supplementary material for: Whole-Genome Sequencing Improves the Diagnosis of DFNB1 Monoallelic Patients
Source: MDPI journal article supplement (doi:10.3390/genes12081267), 2021-08-19
Supplement: s1 [file s1]

| Supplementary material                |              |            |             |              |             |            |              |                  |                |
|---------------------------------------|--------------|------------|-------------|--------------|-------------|------------|--------------|------------------|----------------|
|                                       |              |            |             |              |             |            |              |                  |                |
| Table S1: 215 deafness genes screened |              |            |             |              |             |            |              |                  |                |
| ABHD1<br>2                            | CDH23        | DIABL<br>O | G1PC3       | ILDR1        | MITF        | NLRP<br>3  | PRKCB        | SLC<br>52A<br>3  | TN<br>C        |
| ACTG1                                 | CEACA<br>MI6 | DIAP<br>H1 | G4TA3       | JAG1         | MPZL2       | NPTN       | PRORP        | SLC<br>9A1       | TPR<br>N       |
| ADCY1                                 | CEP78        | DIAP<br>H3 | GATA2       | KARS         | MRPS7       | OPA1       | PRPS1        | SLC<br>9A3<br>R1 | TR1<br>OBP     |
| AIFM1                                 | CHD7         | DMXL<br>2  | GGPS1       | KCNE1        | MSRB3       | OSBP<br>L2 | PTPN11       | SM<br>PX         | TRP<br>P3      |
| ALMS1                                 | CLDNI4       | DNFB<br>59 | GJB1        | KCNJ10       | MT -TH      | OTO<br>A   | PTPRQ        | SN<br>AI2        | TSH<br>Z1      |
| ANKRD<br>11                           | CLIC5        | DSPP       | GJB2        | KCNQ4        | MT-<br>RNR1 | OTOF       | RAF1         | SOX<br>10        | TSP<br>EA<br>R |
| ATP1A3                                | CLPP         | EDN3       | GJB3        | KCNQI        | MT-TE       | OTOG       | RDX          | SPT<br>BN5       | TUB<br>B4B     |
| ATP2B2                                | CLRN1        | EDNR<br>B  | GJB4        | KDM6A        | MT-TF       | OTOG<br>L  | ROR1         | STR<br>C         | TW<br>NK       |
| ATP6V1<br>B1                          | CLRN2        | ELMO<br>D3 | GJB6        | KIAA119<br>9 | MT-TI       | PAX3       | RPGR         | SY<br>NE4        | TW<br>NL4<br>A |
| ATP6V1<br>B2                          | COCH         | EPS8       | GPR98       | KITLG        | MT-TK       | PCDH<br>I5 | S1PR2        | TBC<br>1D2<br>4  | TYR            |
| BCS1L                                 | COL11A<br>1  | EPS8L<br>2 | GPRAS<br>P2 | KMT2D        | MT-<br>TL1  | PDXD<br>CI | SERPIN<br>B6 | TBL<br>IXR<br>1  | US<br>H1<br>C  |
| BDP1                                  | COL11A<br>2  | ERAL1      | GPSM2       | LHFPL5       | MT-TS1      | PDZD<br>7  | SIX1         | TEC<br>TA        | US<br>H1<br>G  |
| BSND                                  | COL2A1       | ESPN       | GRHL2       | LMX1A        | MYH14       | PEX1       | SL1TRK<br>6  | TIM<br>M8<br>A   | US<br>H2<br>A  |
| C0L9A2                                | COL4A5       | ESRP1      | GRHLI       | LONPI        | MYH7<br>B   | PEX26      | SLC17A<br>8  | TJP<br>2         | VEZ<br>T       |
| C1B2                                  | COL4A6       | ESRRB      | GRXC<br>R1  | LOXHD1       | MYH9        | PEX6       | SLC19A<br>2  | TM<br>C1         | VPS<br>13B     |

|             |        |            |             |              |            |            |             |                      |          |
|-------------|--------|------------|-------------|--------------|------------|------------|-------------|----------------------|----------|
| C1SD2       | COL9A1 | EYA1       | GRXC<br>R2  | LRTOMT       | MYO15<br>A | PEX7       | SLC22A<br>4 | TM<br>C2             | WB<br>P2 |
| CABP2       | COL9A3 | EYA4       | HARS        | MAF          | MYO1<br>A  | PHYH       | SLC26A<br>4 | TM<br>EM<br>126<br>A | WF<br>S1 |
| CACNA<br>1D | CRYM   | FAM6<br>5B | HARS2       | MARVEL<br>D2 | MYO3<br>A  | PLCB<br>3  | SLC26A<br>5 | TM<br>EM<br>132<br>E |          |
| CCDC5<br>0  | DAMT1  | FDXR       | HGF         | MCM2         | MYO6       | PMP2<br>2  | SLC29A<br>3 | TMI<br>E             |          |
| CD151       | DCDC2  | FGF3       | HOME<br>R2  | MCOLN3       | MYO7<br>A  | PNPT<br>I  | SLC44A<br>4 | TM<br>PRS<br>S1      |          |
| CD164       | DFNA5  | FGFR3      | HSD17<br>B4 | MET          | NARS2      | POU3<br>F4 | SLC4A1<br>1 | TM<br>PRS<br>S3      |          |
| CDCI4A      | DFNB31 | FOXII      | IARS2       | MIR96        | NLRP1<br>2 | POU4<br>F3 | SLC52A<br>2 | TM<br>TC2            |          |

**Table S2: PCR primer sequences used for cloning into the luciferase reporter construct (5' - 3')**

|           |   |                                              | genomic position<br>chr13 (hg38) |                | distance<br>from the<br><i>GJB2</i><br>transcripti<br>onal start<br>site (kb) |                |  |
|-----------|---|----------------------------------------------|----------------------------------|----------------|-------------------------------------------------------------------------------|----------------|--|
| PGJ<br>B2 | F | CGATCTAAGTAAGCTTCGGTGAATTTAAAC<br>GTTTGGTGGC | 20,192,<br>394                   | 20,193,<br>934 |                                                                               |                |  |
|           | R | CCGGAATGCCAAGCTTCCGCAGAATCCTATC<br>AGTTTCC   |                                  |                |                                                                               |                |  |
| C3        | F | ATAAGGATCCGTCGACCTGCTTCGGCCTCCA<br>AATAG     | 20,419,<br>403                   | 20,420,<br>445 | -<br>221.<br>8                                                                | -<br>222.<br>9 |  |
|           | R | AAGGGCATCGGTCGACCTTCTTCTGGAGTCTT<br>TTCTGG   |                                  |                |                                                                               |                |  |

**Table S3: PCR primer sequences used for mutagenesis (5' - 3')**

|                       |   |                      | genomic position chr13<br>(hg38) |            |
|-----------------------|---|----------------------|----------------------------------|------------|
| PromGJB2_rs1425012952 | F | ccgcggcgcggcccccctcc | 20,193,013                       | 20,193,031 |

|                       |   |                     |  |  |
|-----------------------|---|---------------------|--|--|
| PromGJB2_rs1425012952 | R | ggagggggccgcgccgcgg |  |  |
|-----------------------|---|---------------------|--|--|
